# Supplementary material for: Authentication of Edible Insects’ Powders by the Combination of DART-HRMS Signatures: The First Application of Ambient Mass Spectrometry to Screening of Novel Food
Source: MDPI journal article supplement (doi:10.3390/foods11152264), 2022-07-29
Supplement: s1 [file s1]

## Authentication of edible insects' powders by the combination of DART-HRMS signatures.

### The first application of ambient mass spectrometry to screening of novel food

A. Tata<sup>1§</sup>, A. Massaro<sup>1§</sup>, F. Marzoli<sup>2</sup>, B. Miano<sup>1</sup>, M. Bragolusi<sup>1</sup>, R. Piro<sup>1</sup> and S. Belluco<sup>2</sup>

*1. Istituto Zooprofilattico Sperimentale delle Venezie, Laboratorio di Chimica Sperimentale,*

*Vicenza, Italy*

*2. Department of Food Safety, Istituto Zooprofilattico Sperimentale delle Venezie, Legnaro, Italy*

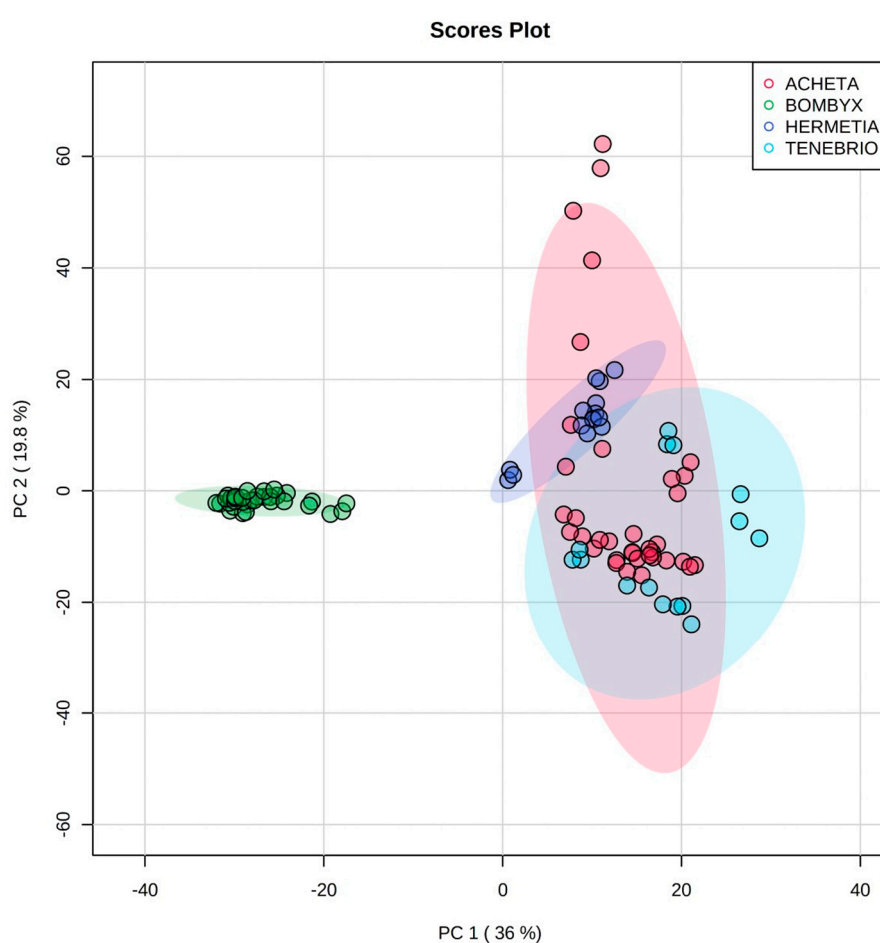

**Figure S1. PCA scores plot.**

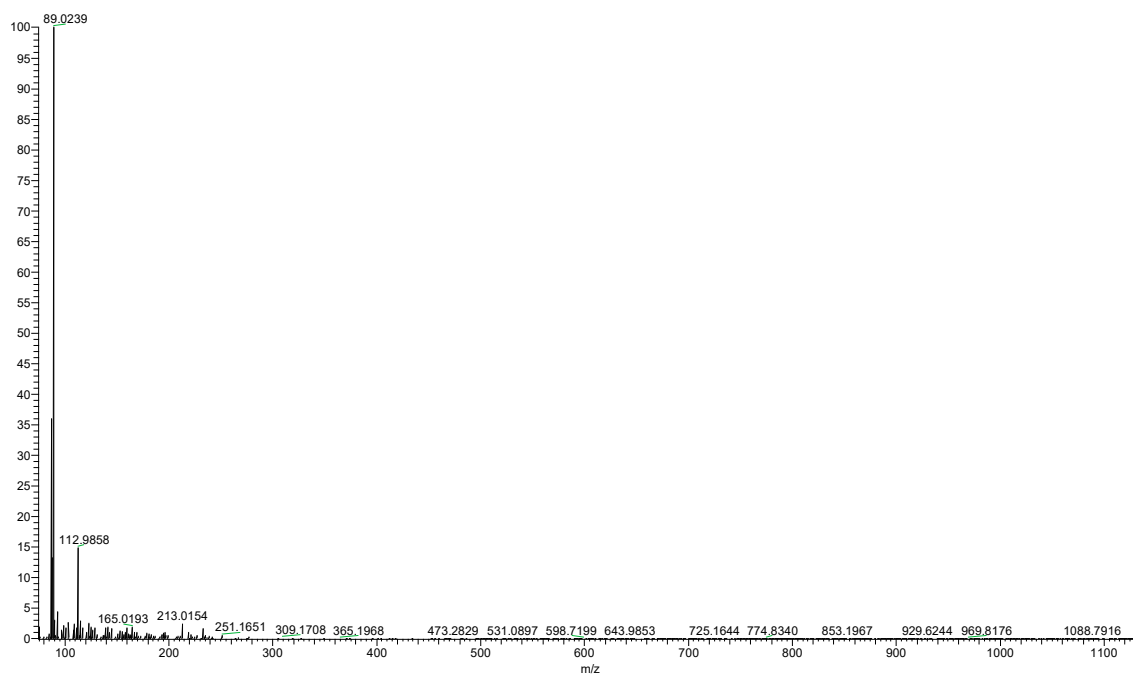

**Figure S2. Blank spectrum of the ethylacetate acquired by DART-HRMS in negative ion mode.**

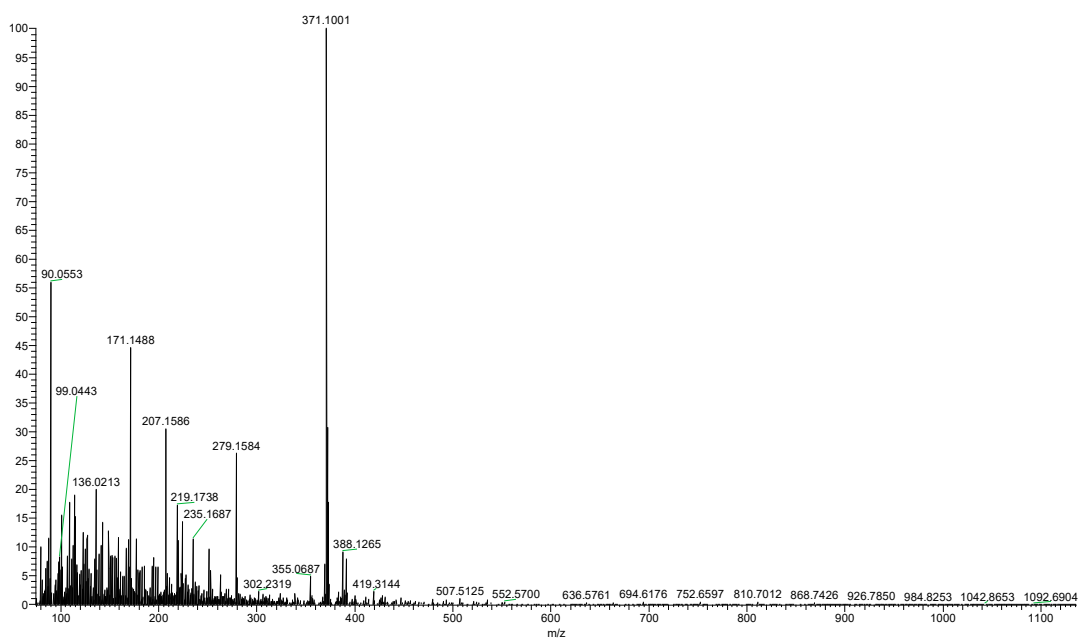

**Figure S3. Blank spectrum of the ethylacetate acquired by DART-HRMS in positive ion mode.**

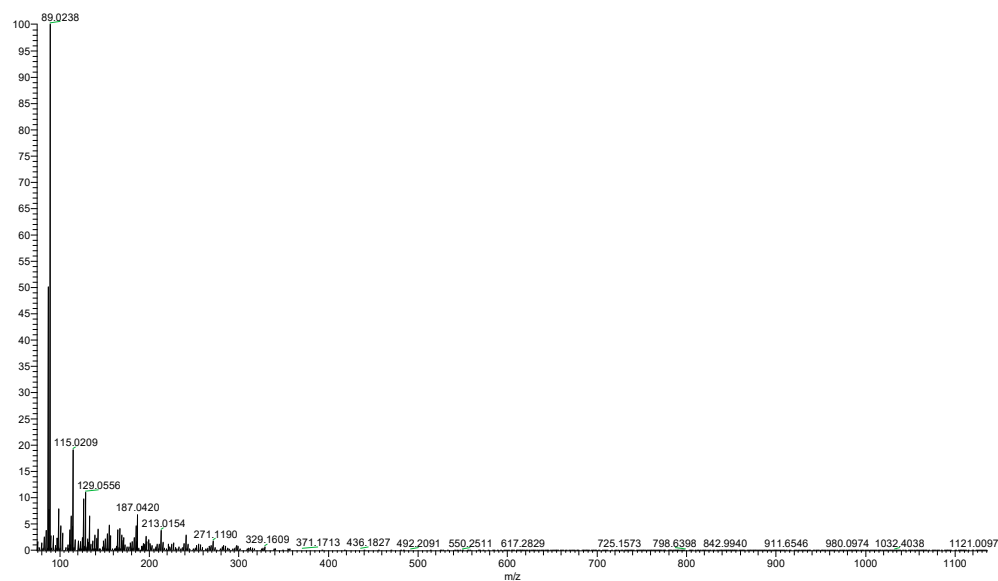

**Figure S4. Blank spectrum of the MeOH: H<sub>2</sub>O (80:20) solvent acquired by DART-HRMS in negative ion mode.**

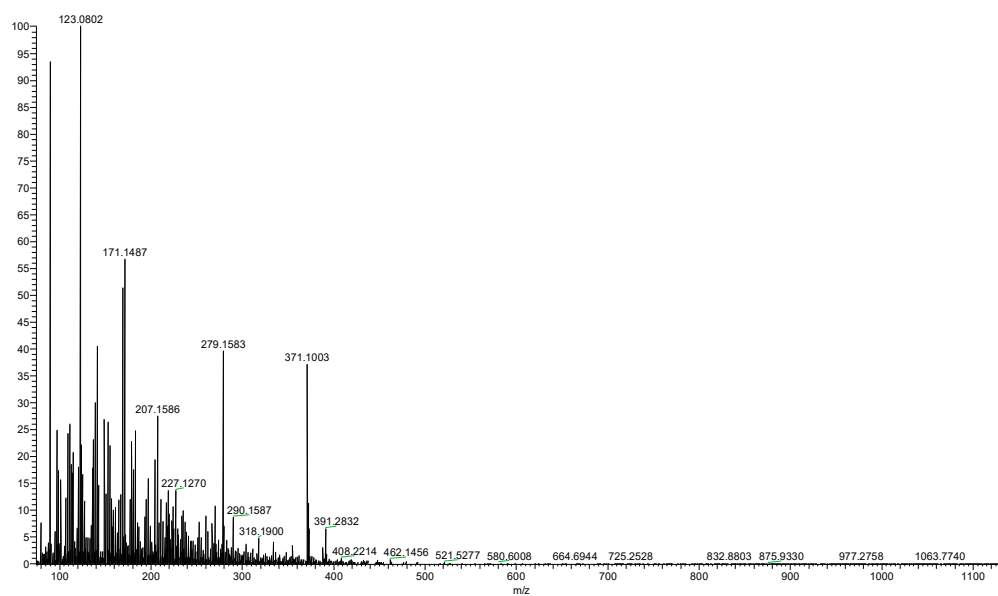

**Figure S5 Blank spectrum of the MeOH: H<sub>2</sub>O (80:20) solvent acquired by DART-HRMS in positive ion mode.**

**Table S1. Confusion matrix with the results of the cross-validation of the random forest classifier on training set. Repetitions of the spectra are included.**

|                        |          | <i>Actual class</i> |        |          |          |
|------------------------|----------|---------------------|--------|----------|----------|
|                        |          | ACHETA              | BOMBYX | HERMETIA | TENEBRIO |
| <i>Predicted class</i> | ACHETA   | 27                  | -      | -        | -        |
|                        | BOMBYX   | -                   | 24     | -        | -        |
|                        | HERMETIA | -                   | -      | 12       | -        |
|                        | TENEBRIO | -                   | -      | -        | 12       |

**Table S2. Confusion matrix with the results of the test of the random forest classifier on withheld test set. Repetitions of the spectra are included.**

|                        |          | <i>Actual class</i> |        |          |          |
|------------------------|----------|---------------------|--------|----------|----------|
|                        |          | ACHETA              | BOMBYX | HERMETIA | TENEBRIO |
| <i>Predicted class</i> | ACHETA   | 9                   | -      | -        | -        |
|                        | BOMBYX   | -                   | 9      | -        | -        |
|                        | HERMETIA | -                   | -      | 3        | -        |
|                        | TENEBRIO | -                   | -      | -        | 3        |
